# Supplementary material for: SCMTHP: A New Approach for Identifying and Characterizing of Tumor-Homing Peptides Using Estimated Propensity Scores of Amino Acids
Source: MDPI journal article supplement (doi:10.3390/pharmaceutics14010122), 2022-01-04
Supplement: s1 [file s1]

# Supplementary Materials: SCMTHP: A New Approach for Identifying and Characterizing of Tumor-Homing Peptides Using Estimated Propensity Scores of Amino Acids

Phasit Charoenkwan, Wararat Chiangjong, Chanin Nantasenamat, Mohammad Ali Moni, Pietro Lio', Balachandran Manavalan and Watshara Shoombuatong

## GA algorithm of for optimizing propensity scores of 20 amino acids

The GA algorithm of the SCM for optimizing Initial-APS consists of the following steps:

Step 1: (Initialization) Generate randomly 40 sets of APS including the Initial-APS.

Step 2: (Evaluation) Compute fitness values from the fitness function (Eq.1) for all sets of APS to determine the best APS in the population.

Step 3: (Crossover) Perform a 20-point crossover between the best APS and each other APS.

Step 4: (Mutation) Randomly mutate individuals (except the best APS) with a mutation probability  $P_m$  ( $=0.01$ ), using a real-valued mutation operator.

Step 5: (Termination) Stop the GA algorithm if the termination condition is reached, otherwise, go to the Step 2. In this study, 20 generations are used as the stop condition.

More details on the optimization dipeptides propensity scores using GA algorithm can be found in previous studies [1-4].

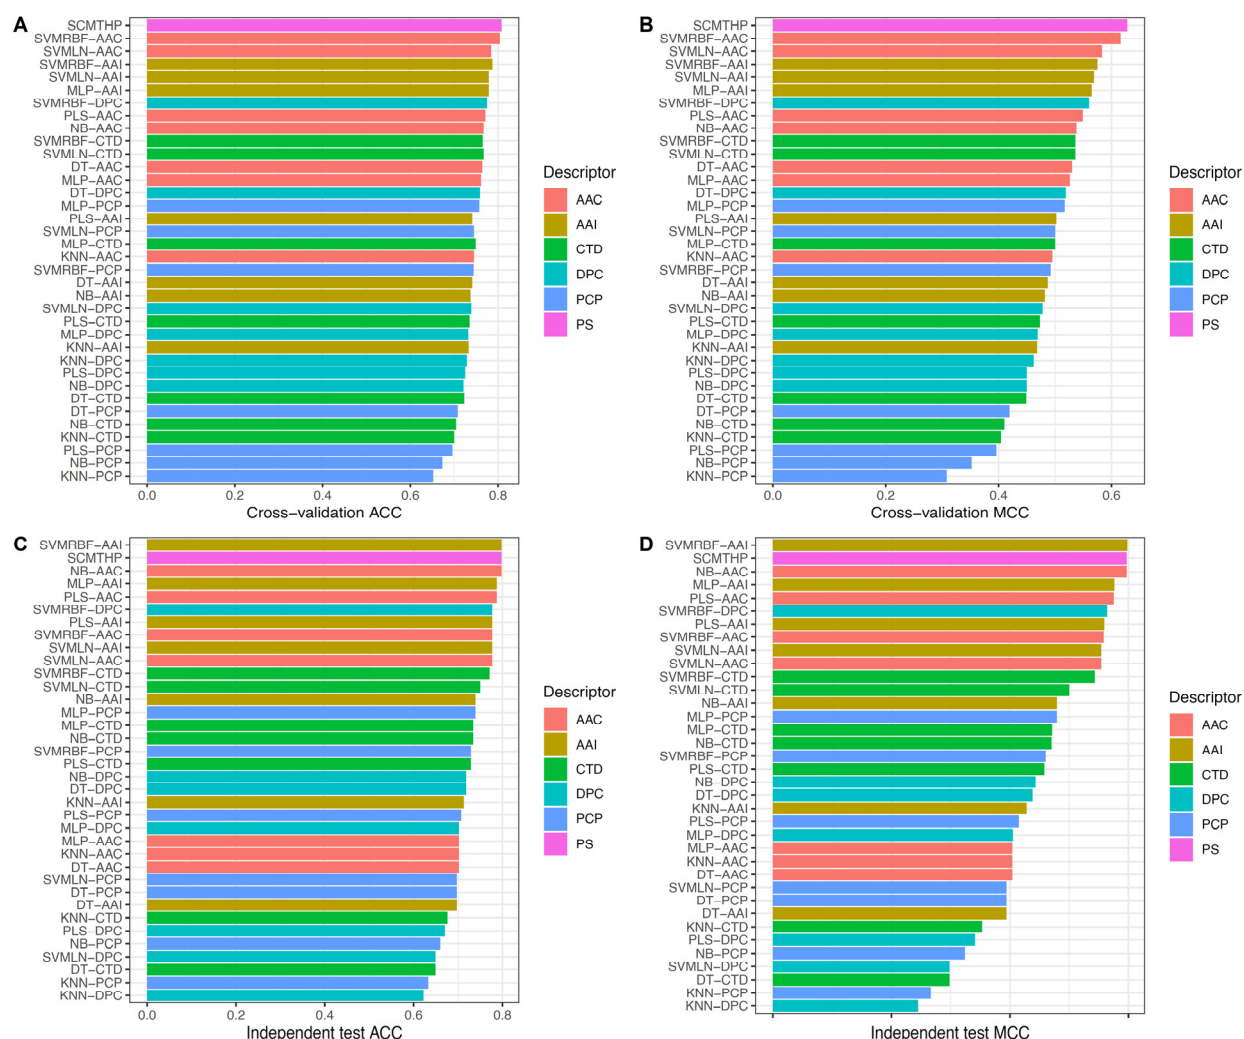

**Figure S1.** Performance evaluations of SCMTHP and other ML-based classifiers in terms of ACC and MCC as evaluated by 10-fold cross-validation (A,B) and independent (C,D) tests on the Small-TRN and Small-IND datasets, respectively.

**Table S1.** Hyperparameter search details for seven popular ML algorithms.

| Method | Parameters           | Range of parameters           |
|--------|----------------------|-------------------------------|
| DT     | max_depth            | Default                       |
| KNN    | number of neighbours | Default                       |
| MLP    | hidden_layer_sizes   | [50, 100, 300, 500]           |
| NB     | sample_weight        | Default parameter             |
| PLS    | #Components          | Default parameter             |
| SVMLN  | Cost                 | $[2^0-2^5]$ in $\log_2$ steps |
| SVMRBF | Cost                 | $[2^0-2^5]$ in $\log_2$ steps |

Columns 2 and 3 represent the parameter name used in the Scikit-learn library and the range of parameter used to develop the model, respectively.

**Table S2.** Cross-validation of ten SCM models trained with ten different sets of propensity scores of amino acids on the Main-TRN dataset.

| #Exp | Cutoff | ACC   | Sn    | Sp    | MCC   | AUC   |
|------|--------|-------|-------|-------|-------|-------|
| 1    | 251    | 0.808 | 0.800 | 0.816 | 0.619 | 0.868 |
| 2    | 330    | 0.814 | 0.802 | 0.825 | 0.629 | 0.866 |
| 3    | 237    | 0.808 | 0.798 | 0.818 | 0.619 | 0.865 |
| 4    | 238    | 0.810 | 0.829 | 0.791 | 0.623 | 0.870 |

|           |            |              |              |              |              |              |
|-----------|------------|--------------|--------------|--------------|--------------|--------------|
| 5         | 318        | 0.803        | 0.756        | 0.850        | 0.611        | 0.851        |
| 6         | 315        | 0.809        | 0.810        | 0.808        | 0.619        | 0.858        |
| 7         | 253        | 0.815        | 0.818        | 0.812        | 0.631        | 0.868        |
| 8         | 243        | 0.809        | 0.831        | 0.787        | 0.621        | 0.868        |
| 9         | 331        | 0.808        | 0.781        | 0.835        | 0.618        | 0.860        |
| <b>10</b> | <b>301</b> | <b>0.820</b> | <b>0.819</b> | <b>0.820</b> | <b>0.641</b> | <b>0.869</b> |
| Mean      |            | 0.810        | 0.805        | 0.816        | 0.623        | 0.864        |
| STD.      |            | 0.005        | 0.023        | 0.019        | 0.009        | 0.006        |

The 10th experiment having the highest cross-validation ACC is used for further analysis in this study.

**Table S3.** Independent test results of ten SCM models trained with ten different sets of propensity scores of amino acids on the Main-IND dataset, respectively.

| #Exp      | Cutoff     | ACC          | Sn           | Sp           | MCC          | AUC          |
|-----------|------------|--------------|--------------|--------------|--------------|--------------|
| 1         | 251        | 0.792        | 0.838        | 0.746        | 0.587        | 0.868        |
| 2         | 330        | 0.777        | 0.831        | 0.723        | 0.557        | 0.866        |
| 3         | 237        | 0.773        | 0.823        | 0.723        | 0.549        | 0.865        |
| 4         | 238        | 0.785        | 0.846        | 0.723        | 0.574        | 0.870        |
| 5         | 318        | 0.819        | 0.854        | 0.785        | 0.640        | 0.851        |
| 6         | 315        | 0.800        | 0.838        | 0.762        | 0.602        | 0.858        |
| 7         | 253        | 0.796        | 0.846        | 0.746        | 0.595        | 0.868        |
| 8         | 243        | 0.785        | 0.862        | 0.708        | 0.576        | 0.868        |
| 9         | 331        | 0.796        | 0.815        | 0.777        | 0.593        | 0.860        |
| <b>10</b> | <b>301</b> | <b>0.827</b> | <b>0.869</b> | <b>0.785</b> | <b>0.656</b> | <b>0.869</b> |
| Mean      |            | 0.795        | 0.842        | 0.748        | 0.593        | 0.864        |
| STD.      |            | 0.017        | 0.017        | 0.028        | 0.034        | 0.006        |

The 10th experiment having the highest cross-validation ACC is used for further analysis in this study.

**Table S4.** Cross-validation of ten SCM models trained with ten different sets of propensity scores of amino acids on the Small-TRN dataset.

| #Exp     | Cutoff     | ACC          | Sn           | Sp           | MCC          | AUC          |
|----------|------------|--------------|--------------|--------------|--------------|--------------|
| 1        | 326        | 0.804        | 0.760        | 0.848        | 0.611        | 0.846        |
| 2        | 365        | 0.799        | 0.789        | 0.808        | 0.599        | 0.837        |
| <b>3</b> | <b>333</b> | <b>0.808</b> | <b>0.723</b> | <b>0.893</b> | <b>0.628</b> | <b>0.853</b> |
| 4        | 299        | 0.805        | 0.744        | 0.867        | 0.619        | 0.855        |
| 5        | 268        | 0.804        | 0.747        | 0.861        | 0.614        | 0.862        |
| 6        | 313        | 0.805        | 0.744        | 0.867        | 0.617        | 0.852        |
| 7        | 321        | 0.807        | 0.755        | 0.859        | 0.618        | 0.846        |
| 8        | 288        | 0.799        | 0.776        | 0.821        | 0.600        | 0.846        |
| 9        | 304        | 0.803        | 0.792        | 0.813        | 0.607        | 0.857        |
| 10       | 279        | 0.799        | 0.707        | 0.891        | 0.612        | 0.859        |
| Mean     |            | 0.803        | 0.754        | 0.853        | 0.612        | 0.851        |
| STD.     |            | 0.003        | 0.027        | 0.030        | 0.009        | 0.007        |

The 3rd experiment having the highest cross-validation ACC is used for further analysis in this study.

**Table S5.** Independent test results of ten SCM models trained with ten different sets of propensity scores of amino acids on the Small-IND dataset, respectively.

| #Exp | Cutoff | ACC   | Sn    | Sp    | MCC   | AUC   |
|------|--------|-------|-------|-------|-------|-------|
| 1    | 326    | 0.777 | 0.809 | 0.745 | 0.554 | 0.846 |
| 2    | 365    | 0.729 | 0.766 | 0.691 | 0.459 | 0.837 |

|      |     |       |       |       |       |       |
|------|-----|-------|-------|-------|-------|-------|
| 3    | 333 | 0.798 | 0.766 | 0.830 | 0.597 | 0.853 |
| 4    | 299 | 0.761 | 0.766 | 0.755 | 0.521 | 0.855 |
| 5    | 268 | 0.777 | 0.809 | 0.745 | 0.554 | 0.862 |
| 6    | 313 | 0.787 | 0.798 | 0.777 | 0.575 | 0.852 |
| 7    | 321 | 0.718 | 0.745 | 0.691 | 0.437 | 0.846 |
| 8    | 288 | 0.745 | 0.819 | 0.670 | 0.495 | 0.846 |
| 9    | 304 | 0.766 | 0.840 | 0.691 | 0.538 | 0.857 |
| 10   | 279 | 0.787 | 0.766 | 0.809 | 0.575 | 0.859 |
| Mean |     | 0.764 | 0.788 | 0.740 | 0.530 | 0.851 |
| STD. |     | 0.026 | 0.031 | 0.054 | 0.053 | 0.007 |

The 3rd experiment having the highest cross-validation ACC is used for further analysis in this study.

**Table S6.** Cross-validation results of seven different ML classifiers with five different feature encodings on Main-TRN dataset.

| Descriptor | Method | Parameter | ACC   | Sn    | Sp    | MCC   | AUC   |
|------------|--------|-----------|-------|-------|-------|-------|-------|
| AAC        | DT     | N/A       | 0.775 | 0.779 | 0.772 | 0.553 | 0.775 |
|            | KNN    | N/A       | 0.786 | 0.743 | 0.829 | 0.579 | 0.786 |
|            | MLP    | 100       | 0.794 | 0.800 | 0.787 | 0.590 | 0.870 |
|            | NB     | N/A       | 0.775 | 0.710 | 0.841 | 0.558 | 0.854 |
|            | PLS    | N/A       | 0.791 | 0.747 | 0.835 | 0.585 | 0.860 |
|            | SVMLN  | 32        | 0.799 | 0.766 | 0.833 | 0.602 | 0.866 |
|            | SVMRBF | 4         | 0.833 | 0.835 | 0.831 | 0.669 | 0.902 |
| AAI        | DT     | N/A       | 0.738 | 0.743 | 0.733 | 0.478 | 0.738 |
|            | KNN    | N/A       | 0.772 | 0.741 | 0.802 | 0.545 | 0.772 |
|            | MLP    | 100       | 0.805 | 0.768 | 0.842 | 0.618 | 0.882 |
|            | NB     | N/A       | 0.743 | 0.683 | 0.802 | 0.491 | 0.805 |
|            | PLS    | N/A       | 0.771 | 0.693 | 0.848 | 0.552 | 0.845 |
|            | SVMLN  | 4         | 0.800 | 0.768 | 0.833 | 0.604 | 0.866 |
|            | SVMRBF | 2         | 0.819 | 0.796 | 0.841 | 0.639 | 0.894 |
| CTD        | DT     | N/A       | 0.731 | 0.729 | 0.733 | 0.464 | 0.731 |
|            | KNN    | N/A       | 0.722 | 0.687 | 0.756 | 0.447 | 0.722 |
|            | MLP    | 50        | 0.796 | 0.800 | 0.791 | 0.594 | 0.867 |
|            | NB     | N/A       | 0.707 | 0.683 | 0.731 | 0.417 | 0.776 |
|            | PLS    | N/A       | 0.763 | 0.747 | 0.779 | 0.527 | 0.832 |
|            | SVMLN  | 1         | 0.815 | 0.802 | 0.827 | 0.631 | 0.883 |
|            | SVMRBF | 4         | 0.798 | 0.768 | 0.827 | 0.598 | 0.880 |
| DPC        | DT     | N/A       | 0.729 | 0.733 | 0.726 | 0.463 | 0.729 |
|            | KNN    | N/A       | 0.725 | 0.536 | 0.914 | 0.485 | 0.725 |
|            | MLP    | 100       | 0.776 | 0.728 | 0.823 | 0.556 | 0.840 |
|            | NB     | N/A       | 0.764 | 0.708 | 0.819 | 0.533 | 0.788 |
|            | PLS    | N/A       | 0.762 | 0.732 | 0.793 | 0.527 | 0.820 |
|            | SVMLN  | 1         | 0.753 | 0.724 | 0.783 | 0.510 | 0.822 |
|            | SVMRBF | 8         | 0.807 | 0.846 | 0.768 | 0.619 | 0.898 |
| PCP        | DT     | N/A       | 0.717 | 0.758 | 0.676 | 0.438 | 0.717 |
|            | KNN    | N/A       | 0.731 | 0.728 | 0.735 | 0.464 | 0.731 |
|            | MLP    | 100       | 0.771 | 0.772 | 0.770 | 0.545 | 0.847 |
|            | NB     | N/A       | 0.690 | 0.643 | 0.737 | 0.382 | 0.755 |
|            | PLS    | N/A       | 0.701 | 0.674 | 0.727 | 0.402 | 0.772 |
|            | SVMLN  | 2         | 0.734 | 0.710 | 0.758 | 0.471 | 0.796 |
|            | SVMRBF | 8         | 0.762 | 0.749 | 0.776 | 0.527 | 0.832 |

**Table S7.** Independent test results of seven different ML classifiers with five different feature encodings on Main-IND dataset.

| Descriptor | Method | Parameter | ACC   | Sn    | Sp    | MCC   | AUC   |
|------------|--------|-----------|-------|-------|-------|-------|-------|
| AAC        | DT     | N/A       | 0.812 | 0.823 | 0.800 | 0.623 | 0.812 |
|            | KNN    | N/A       | 0.785 | 0.831 | 0.738 | 0.572 | 0.785 |
|            | MLP    | 100       | 0.800 | 0.854 | 0.746 | 0.604 | 0.879 |
|            | NB     | N/A       | 0.804 | 0.823 | 0.785 | 0.608 | 0.894 |
|            | PLS    | N/A       | 0.800 | 0.823 | 0.777 | 0.601 | 0.875 |
|            | SVMLN  | 32        | 0.808 | 0.838 | 0.777 | 0.617 | 0.888 |
|            | SVMRBF | 4         | 0.804 | 0.838 | 0.769 | 0.609 | 0.894 |
| AAI        | DT     | N/A       | 0.750 | 0.815 | 0.685 | 0.504 | 0.750 |
|            | KNN    | N/A       | 0.796 | 0.754 | 0.838 | 0.594 | 0.796 |
|            | MLP    | 100       | 0.808 | 0.792 | 0.823 | 0.616 | 0.888 |
|            | NB     | N/A       | 0.765 | 0.800 | 0.731 | 0.532 | 0.827 |
|            | PLS    | N/A       | 0.785 | 0.808 | 0.762 | 0.570 | 0.864 |
|            | SVMLN  | 4         | 0.804 | 0.838 | 0.769 | 0.609 | 0.888 |
|            | SVMRBF | 2         | 0.827 | 0.869 | 0.785 | 0.656 | 0.903 |
| CTD        | DT     | N/A       | 0.762 | 0.769 | 0.754 | 0.523 | 0.762 |
|            | KNN    | N/A       | 0.781 | 0.785 | 0.777 | 0.562 | 0.781 |
|            | MLP    | 50        | 0.808 | 0.915 | 0.700 | 0.630 | 0.923 |
|            | NB     | N/A       | 0.738 | 0.762 | 0.715 | 0.477 | 0.787 |
|            | PLS    | N/A       | 0.777 | 0.815 | 0.738 | 0.555 | 0.855 |
|            | SVMLN  | 1         | 0.812 | 0.915 | 0.708 | 0.637 | 0.887 |
|            | SVMRBF | 4         | 0.846 | 0.862 | 0.831 | 0.693 | 0.920 |
| DPC        | DT     | N/A       | 0.742 | 0.792 | 0.692 | 0.487 | 0.742 |
|            | KNN    | N/A       | 0.696 | 0.508 | 0.885 | 0.424 | 0.696 |
|            | MLP    | 100       | 0.758 | 0.762 | 0.754 | 0.515 | 0.834 |
|            | NB     | N/A       | 0.785 | 0.800 | 0.769 | 0.570 | 0.816 |
|            | PLS    | N/A       | 0.782 | 0.791 | 0.773 | 0.564 | 0.840 |
|            | SVMLN  | 1         | 0.746 | 0.769 | 0.723 | 0.493 | 0.803 |
|            | SVMRBF | 8         | 0.777 | 0.838 | 0.715 | 0.558 | 0.863 |
| PCP        | DT     | N/A       | 0.727 | 0.815 | 0.638 | 0.461 | 0.730 |
|            | KNN    | N/A       | 0.727 | 0.746 | 0.708 | 0.454 | 0.727 |
|            | MLP    | 100       | 0.785 | 0.823 | 0.746 | 0.571 | 0.901 |
|            | NB     | N/A       | 0.727 | 0.746 | 0.708 | 0.454 | 0.792 |
|            | PLS    | N/A       | 0.735 | 0.762 | 0.708 | 0.470 | 0.816 |
|            | SVMLN  | 2         | 0.765 | 0.800 | 0.731 | 0.532 | 0.863 |
|            | SVMRBF | 8         | 0.788 | 0.862 | 0.715 | 0.583 | 0.877 |

**Table S8.** Cross-validation results of seven different ML classifiers with five different feature encodings on Small-TRN dataset.

| Descriptor | Method | Parameter | ACC   | Sn    | Sp    | MCC   | AUC   |
|------------|--------|-----------|-------|-------|-------|-------|-------|
| AAC        | DT     | N/A       | 0.764 | 0.771 | 0.757 | 0.530 | 0.764 |
|            | KNN    | N/A       | 0.745 | 0.771 | 0.720 | 0.495 | 0.745 |
|            | MLP    | 50        | 0.761 | 0.787 | 0.736 | 0.526 | 0.845 |
|            | NB     | N/A       | 0.767 | 0.731 | 0.803 | 0.538 | 0.836 |
|            | PLS    | N/A       | 0.771 | 0.701 | 0.840 | 0.549 | 0.850 |
|            | SVMLN  | 1         | 0.784 | 0.680 | 0.888 | 0.583 | 0.846 |
|            | SVMRBF | 1         | 0.804 | 0.731 | 0.877 | 0.616 | 0.872 |
| AAI        | DT     | N/A       | 0.741 | 0.766 | 0.717 | 0.487 | 0.741 |
|            | KNN    | N/A       | 0.733 | 0.738 | 0.728 | 0.468 | 0.733 |

|     |        |     |       |       |       |       |       |
|-----|--------|-----|-------|-------|-------|-------|-------|
|     | MLP    | 100 | 0.779 | 0.738 | 0.818 | 0.565 | 0.864 |
|     | NB     | N/A | 0.737 | 0.677 | 0.797 | 0.482 | 0.805 |
|     | PLS    | N/A | 0.741 | 0.624 | 0.859 | 0.502 | 0.841 |
|     | SVMLN  | 1   | 0.779 | 0.693 | 0.864 | 0.569 | 0.848 |
|     | SVMRBF | 8   | 0.787 | 0.781 | 0.792 | 0.575 | 0.856 |
| CTD | DT     | N/A | 0.723 | 0.720 | 0.725 | 0.449 | 0.723 |
|     | KNN    | N/A | 0.700 | 0.739 | 0.661 | 0.404 | 0.700 |
|     | MLP    | 100 | 0.749 | 0.739 | 0.759 | 0.500 | 0.828 |
|     | NB     | N/A | 0.704 | 0.726 | 0.682 | 0.410 | 0.778 |
|     | PLS    | N/A | 0.735 | 0.689 | 0.781 | 0.473 | 0.799 |
|     | SVMLN  | 1   | 0.767 | 0.736 | 0.797 | 0.536 | 0.827 |
|     | SVMRBF | 4   | 0.765 | 0.723 | 0.807 | 0.536 | 0.838 |
| DPC | DT     | N/A | 0.759 | 0.755 | 0.763 | 0.519 | 0.759 |
|     | KNN    | N/A | 0.729 | 0.725 | 0.733 | 0.462 | 0.729 |
|     | MLP    | 50  | 0.732 | 0.726 | 0.739 | 0.469 | 0.800 |
|     | NB     | N/A | 0.721 | 0.640 | 0.802 | 0.450 | 0.737 |
|     | PLS    | N/A | 0.725 | 0.720 | 0.729 | 0.450 | 0.797 |
|     | SVMLN  | 1   | 0.739 | 0.733 | 0.744 | 0.478 | 0.802 |
|     | SVMRBF | 1   | 0.775 | 0.683 | 0.866 | 0.560 | 0.848 |
| PCP | DT     | N/A | 0.708 | 0.739 | 0.678 | 0.419 | 0.711 |
|     | KNN    | N/A | 0.652 | 0.689 | 0.616 | 0.308 | 0.652 |
|     | MLP    | 100 | 0.757 | 0.733 | 0.781 | 0.517 | 0.829 |
|     | NB     | N/A | 0.673 | 0.736 | 0.611 | 0.352 | 0.750 |
|     | PLS    | N/A | 0.696 | 0.673 | 0.720 | 0.396 | 0.779 |
|     | SVMLN  | 2   | 0.745 | 0.659 | 0.832 | 0.500 | 0.805 |
|     | SVMRBF | 1   | 0.744 | 0.691 | 0.797 | 0.492 | 0.811 |

**Table S9.** Independent test results of seven different ML classifiers with five different feature encodings on Small-IND dataset.

| Descriptor | Method | Parameter | ACC   | Sn    | Sp    | MCC   | AUC   |
|------------|--------|-----------|-------|-------|-------|-------|-------|
| AAC        | DT     | N/A       | 0.702 | 0.702 | 0.702 | 0.404 | 0.702 |
|            | KNN    | N/A       | 0.702 | 0.713 | 0.691 | 0.404 | 0.702 |
|            | MLP    | 50        | 0.702 | 0.713 | 0.691 | 0.404 | 0.788 |
|            | NB     | N/A       | 0.798 | 0.830 | 0.766 | 0.597 | 0.863 |
|            | PLS    | N/A       | 0.787 | 0.777 | 0.798 | 0.575 | 0.856 |
|            | SVMLN  | 1         | 0.777 | 0.745 | 0.809 | 0.554 | 0.839 |
|            | SVMRBF | 1         | 0.777 | 0.713 | 0.840 | 0.558 | 0.837 |
| AAI        | DT     | N/A       | 0.697 | 0.681 | 0.713 | 0.394 | 0.697 |
|            | KNN    | N/A       | 0.713 | 0.766 | 0.660 | 0.428 | 0.713 |
|            | MLP    | 100       | 0.787 | 0.755 | 0.819 | 0.576 | 0.865 |
|            | NB     | N/A       | 0.739 | 0.745 | 0.734 | 0.479 | 0.814 |
|            | PLS    | N/A       | 0.777 | 0.702 | 0.851 | 0.559 | 0.849 |
|            | SVMLN  | 1         | 0.777 | 0.745 | 0.809 | 0.554 | 0.840 |
|            | SVMRBF | 8         | 0.798 | 0.755 | 0.840 | 0.598 | 0.845 |
| CTD        | DT     | N/A       | 0.649 | 0.681 | 0.617 | 0.298 | 0.649 |
|            | KNN    | N/A       | 0.676 | 0.734 | 0.617 | 0.353 | 0.676 |
|            | MLP    | 100       | 0.734 | 0.787 | 0.681 | 0.471 | 0.828 |
|            | NB     | N/A       | 0.734 | 0.777 | 0.691 | 0.470 | 0.795 |
|            | PLS    | N/A       | 0.729 | 0.713 | 0.745 | 0.458 | 0.829 |
|            | SVMLN  | 1         | 0.750 | 0.766 | 0.734 | 0.500 | 0.835 |
|            | SVMRBF | 4         | 0.771 | 0.755 | 0.787 | 0.543 | 0.845 |

|     |        |     |       |       |       |       |       |
|-----|--------|-----|-------|-------|-------|-------|-------|
| DPC | DT     | N/A | 0.718 | 0.766 | 0.670 | 0.438 | 0.718 |
|     | KNN    | N/A | 0.622 | 0.606 | 0.638 | 0.245 | 0.622 |
|     | MLP    | 50  | 0.702 | 0.681 | 0.723 | 0.405 | 0.747 |
|     | NB     | N/A | 0.718 | 0.628 | 0.809 | 0.443 | 0.720 |
|     | PLS    | N/A | 0.670 | 0.649 | 0.691 | 0.341 | 0.758 |
|     | SVMLN  | 1   | 0.649 | 0.660 | 0.638 | 0.298 | 0.697 |
|     | SVMRBF | 1   | 0.777 | 0.681 | 0.872 | 0.564 | 0.825 |
| PCP | DT     | N/A | 0.697 | 0.713 | 0.681 | 0.394 | 0.701 |
|     | KNN    | N/A | 0.633 | 0.649 | 0.617 | 0.266 | 0.633 |
|     | MLP    | 100 | 0.739 | 0.723 | 0.755 | 0.479 | 0.811 |
|     | NB     | N/A | 0.660 | 0.745 | 0.574 | 0.324 | 0.720 |
|     | PLS    | N/A | 0.707 | 0.702 | 0.713 | 0.415 | 0.738 |
|     | SVMLN  | 2   | 0.697 | 0.702 | 0.691 | 0.394 | 0.771 |
|     | SVMRBF | 1   | 0.729 | 0.681 | 0.777 | 0.460 | 0.779 |

**Table S10.** Cross-validation and independent test results of SCM-based classifiers by using Initial-APS and Optimized-APS as evaluated on the Main and Small datasets.

| Dataset | Cross-validation | Feature       | ACC   | Sn    | Sp    | MCC   | AUC   |
|---------|------------------|---------------|-------|-------|-------|-------|-------|
| Main    | 10-fold CV       | Initial-APS   | 0.752 | 0.695 | 0.810 | 0.511 | 0.831 |
|         |                  | Optimized-APS | 0.820 | 0.819 | 0.820 | 0.641 | 0.869 |
|         | Independent test | Initial-APS   | 0.738 | 0.792 | 0.685 | 0.480 | 0.831 |
|         |                  | Optimized-APS | 0.827 | 0.869 | 0.785 | 0.656 | 0.869 |
| Small   | 10-fold CV       | Initial-APS   | 0.739 | 0.747 | 0.731 | 0.479 | 0.840 |
|         |                  | Optimized-APS | 0.808 | 0.723 | 0.893 | 0.628 | 0.853 |
|         | Independent test | Initial-APS   | 0.729 | 0.798 | 0.660 | 0.462 | 0.840 |
|         |                  | Optimized-APS | 0.798 | 0.766 | 0.830 | 0.597 | 0.853 |

**Table S11.** The twenty top-ranked informative physicochemical properties having the highest Pearson correlation (R) with the propensity scores of amino acids on Main-TRN dataset.

| Rank | AAindex    | R     | Description                                                                                          |
|------|------------|-------|------------------------------------------------------------------------------------------------------|
| 1    | MCMT640101 | 0.635 | Refractivity (McMeekin et al., 1964), Cited by Jones (1975)                                          |
| 2    | ZASB820101 | 0.623 | Dependence of partition coefficient on ionic strength (Zaslavsky et al., 1982)                       |
| 3    | RACS820104 | 0.557 | Average relative fractional occurrence in EL(i) (Rackovsky-Scheraga, 1982)                           |
| 4    | GARJ730101 | 0.512 | Partition coefficient (Garel et al., 1973)                                                           |
| 5    | WIMW960101 | 0.507 | Free energies of transfer of AcWl-X-LL peptides from bilayer interface to water (Wimley-White, 1996) |
| 6    | CHOP780215 | 0.492 | Frequency of the 4th residue in turn (Chou-Fasman, 1978b)                                            |
| 7    | MEEJ810101 | 0.476 | Retention coefficient in NaClO <sub>4</sub> (Meek-Rossetti, 1981)                                    |
| 8    | CASG920101 | 0.465 | Hydrophobicity scale from native protein structures (Casari-Sippl, 1992)                             |
| 9    | WOLS870103 | 0.457 | Principal property value z <sub>3</sub> (Wold et al., 1987)                                          |
| 10   | ROBB760110 | 0.45  | Information measure for middle turn (Robson-Suzuki, 1976)                                            |
| 11   | WERD780101 | 0.445 | Propensity to be buried inside (Wertz-Scheraga, 1978)                                                |
| 12   | ZHOH040103 | 0.442 | Buriability (Zhou-Zhou, 2004)                                                                        |
| 13   | SUYM030101 | 0.44  | Linker propensity index (Suyama-Ohara, 2003)                                                         |

---

|    |            |       |                                                                                     |
|----|------------|-------|-------------------------------------------------------------------------------------|
| 14 | ZHOH040101 | 0.435 | The stability scale from the knowledge-based atom-atom potential (Zhou-Zhou, 2004)  |
| 15 | WILM950103 | 0.434 | Hydrophobicity coefficient in RP-HPLC, C4 with 0.1%TFA/MeCN/H2O (Wilce et al. 1995) |
| 16 | QIAN880127 | 0.434 | Weights for coil at the window position of -6 (Qian-Sejnowski, 1988)                |
| 17 | BAEK050101 | 0.434 | Linker index (Bae et al., 2005)                                                     |
| 18 | RICJ880107 | 0.432 | Relative preference value at N4 (Richardson-Richardson, 1988)                       |
| 19 | ROBB760108 | 0.429 | Information measure for turn (Robson-Suzuki, 1976)                                  |
| 20 | LEVM760107 | 0.426 | van der Waals parameter epsilon (Levitt, 1976)                                      |

---

## References

1. P. Charoenkwan, W. Shoombuatong, H.-C. Lee, J. Chaijaruwanich, H.-L. Huang, and S.-Y. Ho, "SCMCRY: predicting protein crystallization using an ensemble scoring card method with estimating propensity scores of P-collocated amino acid pairs," *PloS one*, vol. 8, no. 9, p. e72368, 2013.
2. H.-L. Huang *et al.*, "Prediction and analysis of protein solubility using a novel scoring card method with dipeptide composition," in *BMC bioinformatics*, 2012, vol. 13, no. 17, pp. 1-14: Springer.
3. P. Charoenkwan, W. Chiangjong, V. S. Lee, C. Nantasenamat, M. M. Hasan, and W. Shoombuatong, "Improved prediction and characterization of anticancer activities of peptides using a novel flexible scoring card method," *Scientific reports*, vol. 11, no. 1, pp. 1-13, 2021.
4. P. Charoenkwan, N. Schaduengrat, C. Nantasenamat, T. Piacham, and W. Shoombuatong, "iQSP: A Sequence-Based Tool for the Prediction and Analysis of Quorum Sensing Peptides Using Informative Physicochemical Properties," *International Journal of Molecular Sciences*, vol. 21, no. 1, p. 75, 2020.
